# Supplementary material for: LPS stimulating upregulates lipid accumulation in mice liver dependent onSTAT1/APOE axis signaling pathway.
Source: Research Square preprint supplement (doi:10.21203/rs.3.rs-6214389/v1), 2025-04-10

Supplementary Figure 4: Unprocessed image of Figure 3

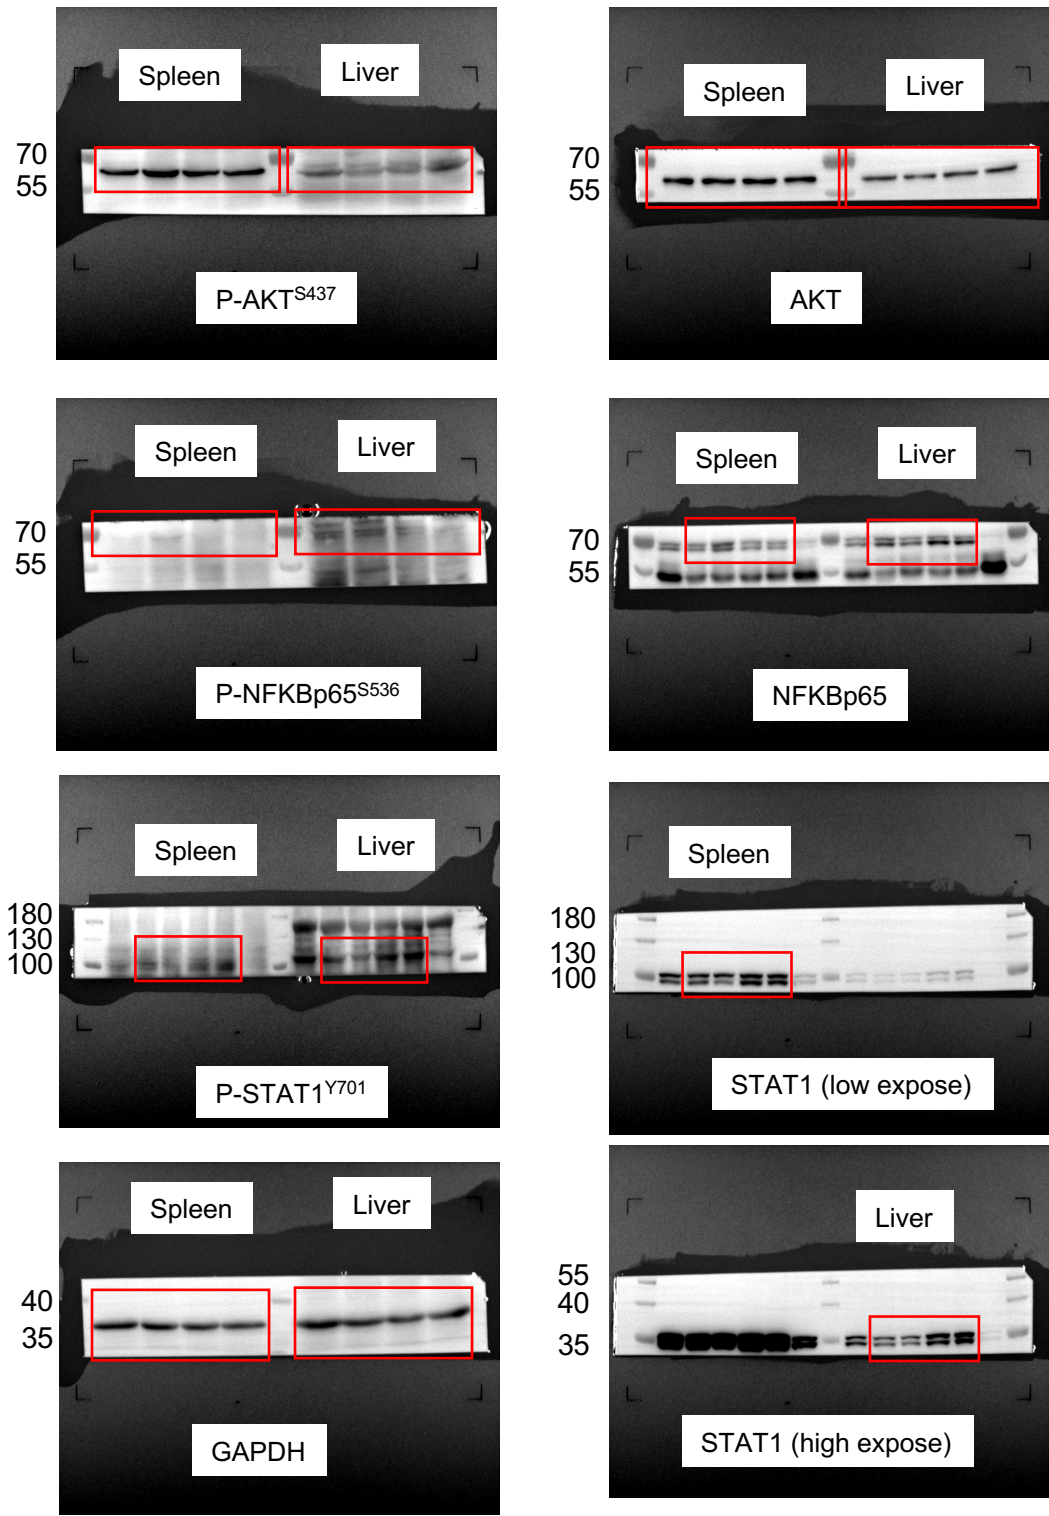

Supplementary Figure 5: Unprocessed image of Figure 4B

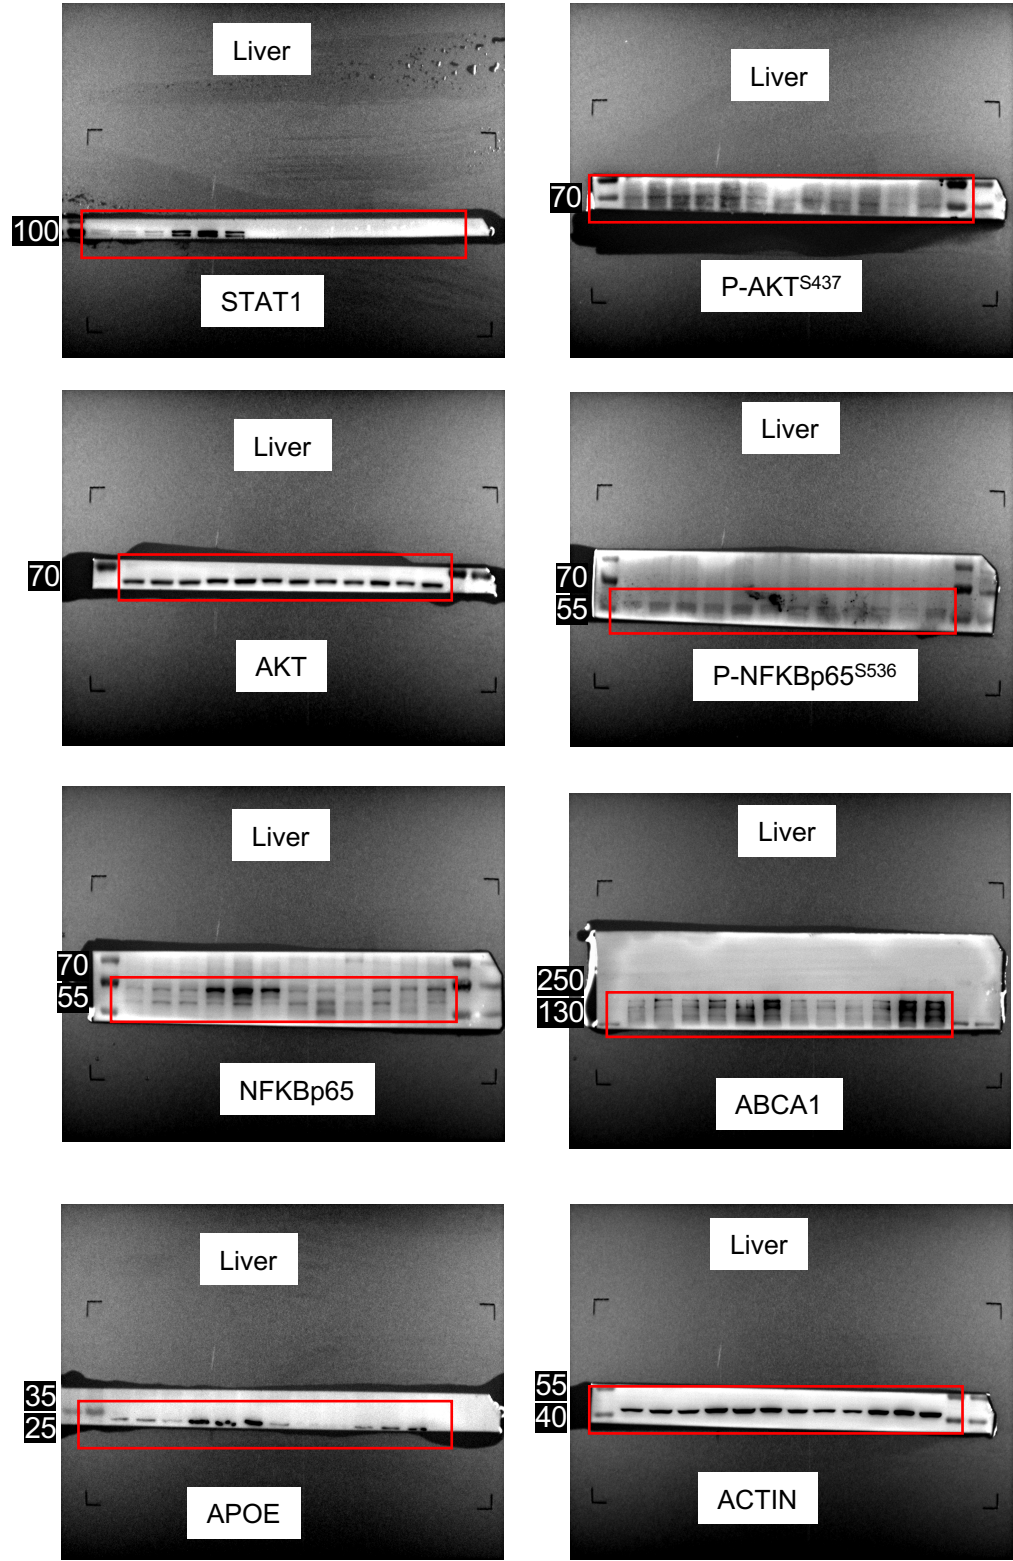



Supplementary Figure 6: Unprocessed image of Figure 4C

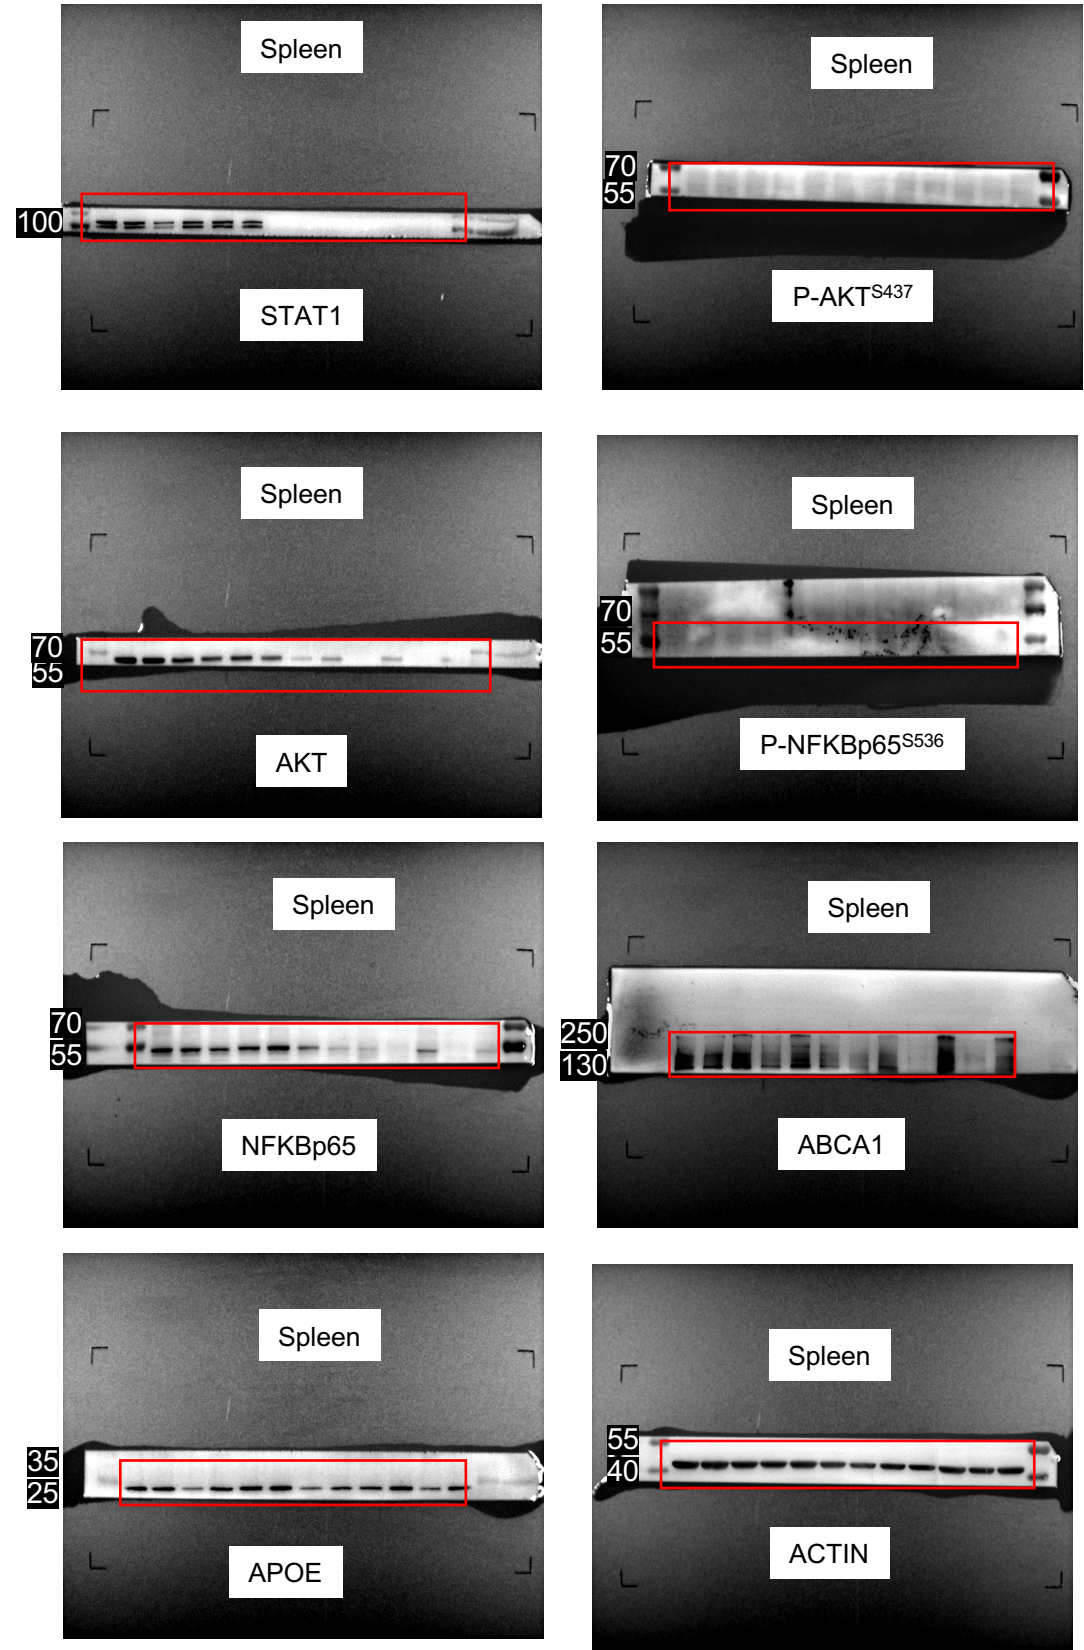

Supplementary Figure 7: Unprocessed image of sFigure 3

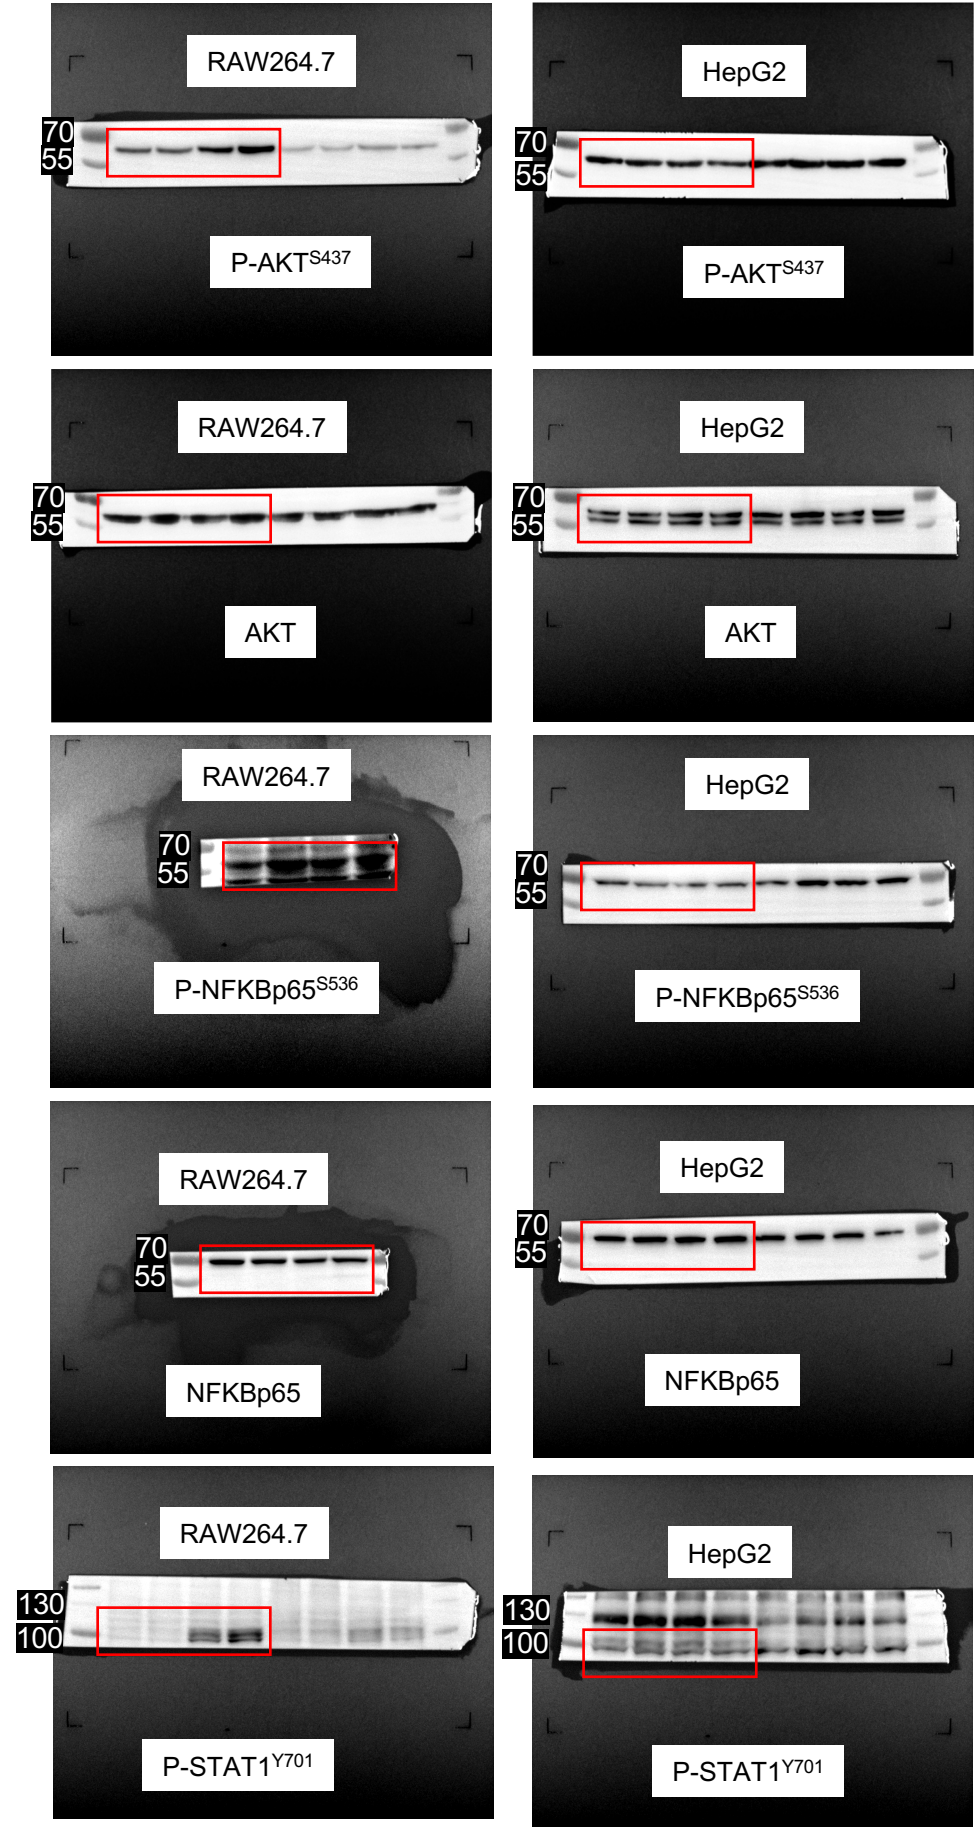



Continued Supplementary Figure 7: Unprocessed image of sFigure 3

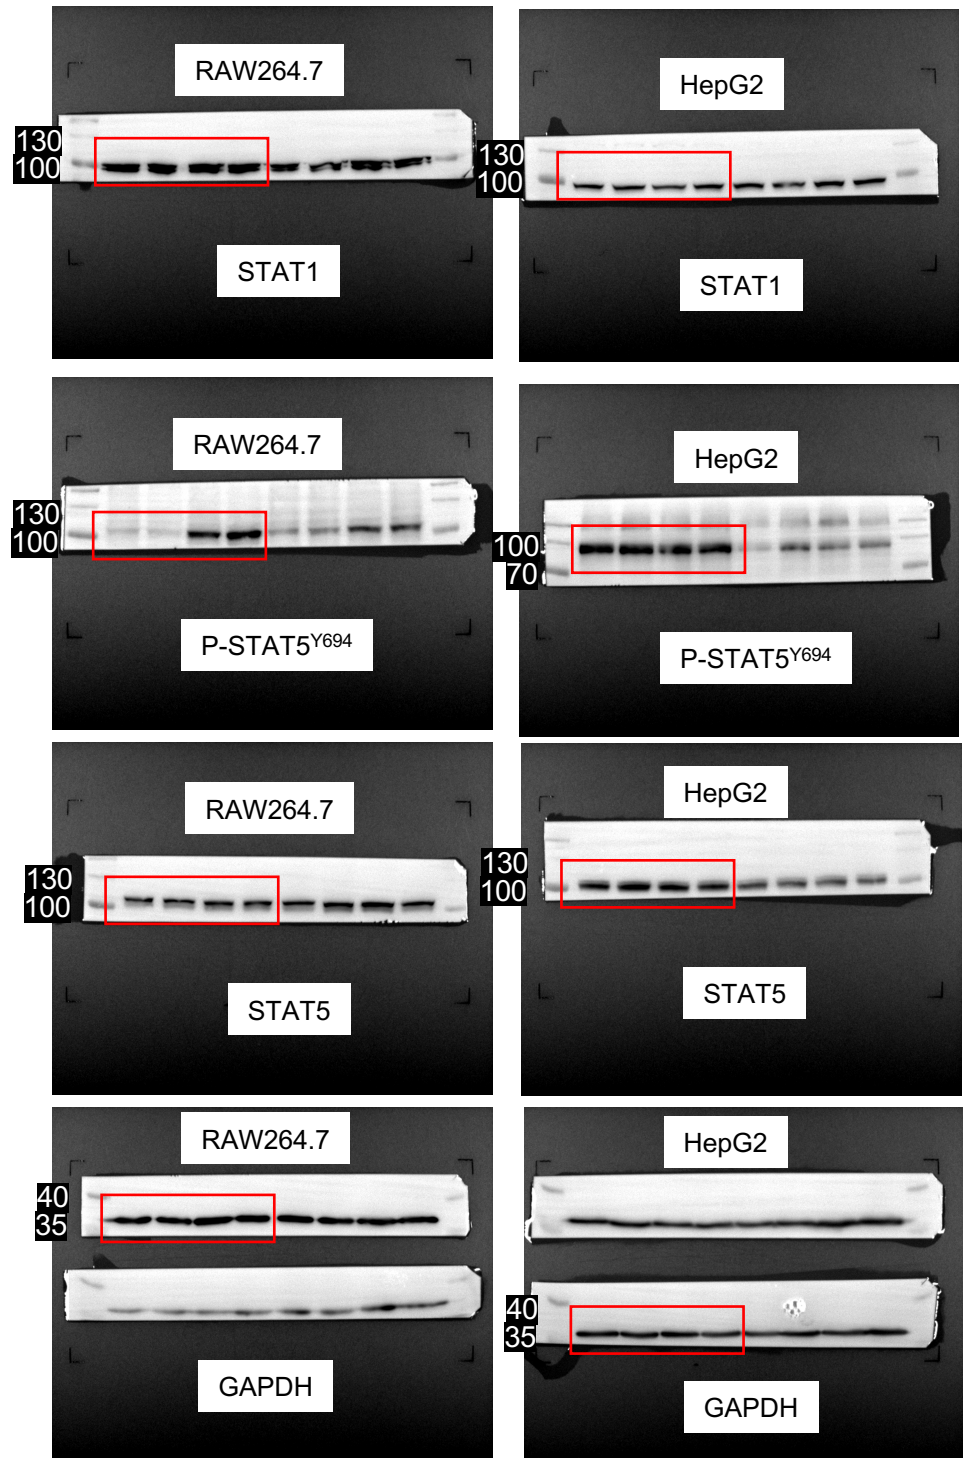



Continued Supplementary Figure 7: Unprocessed image of sFigure 3

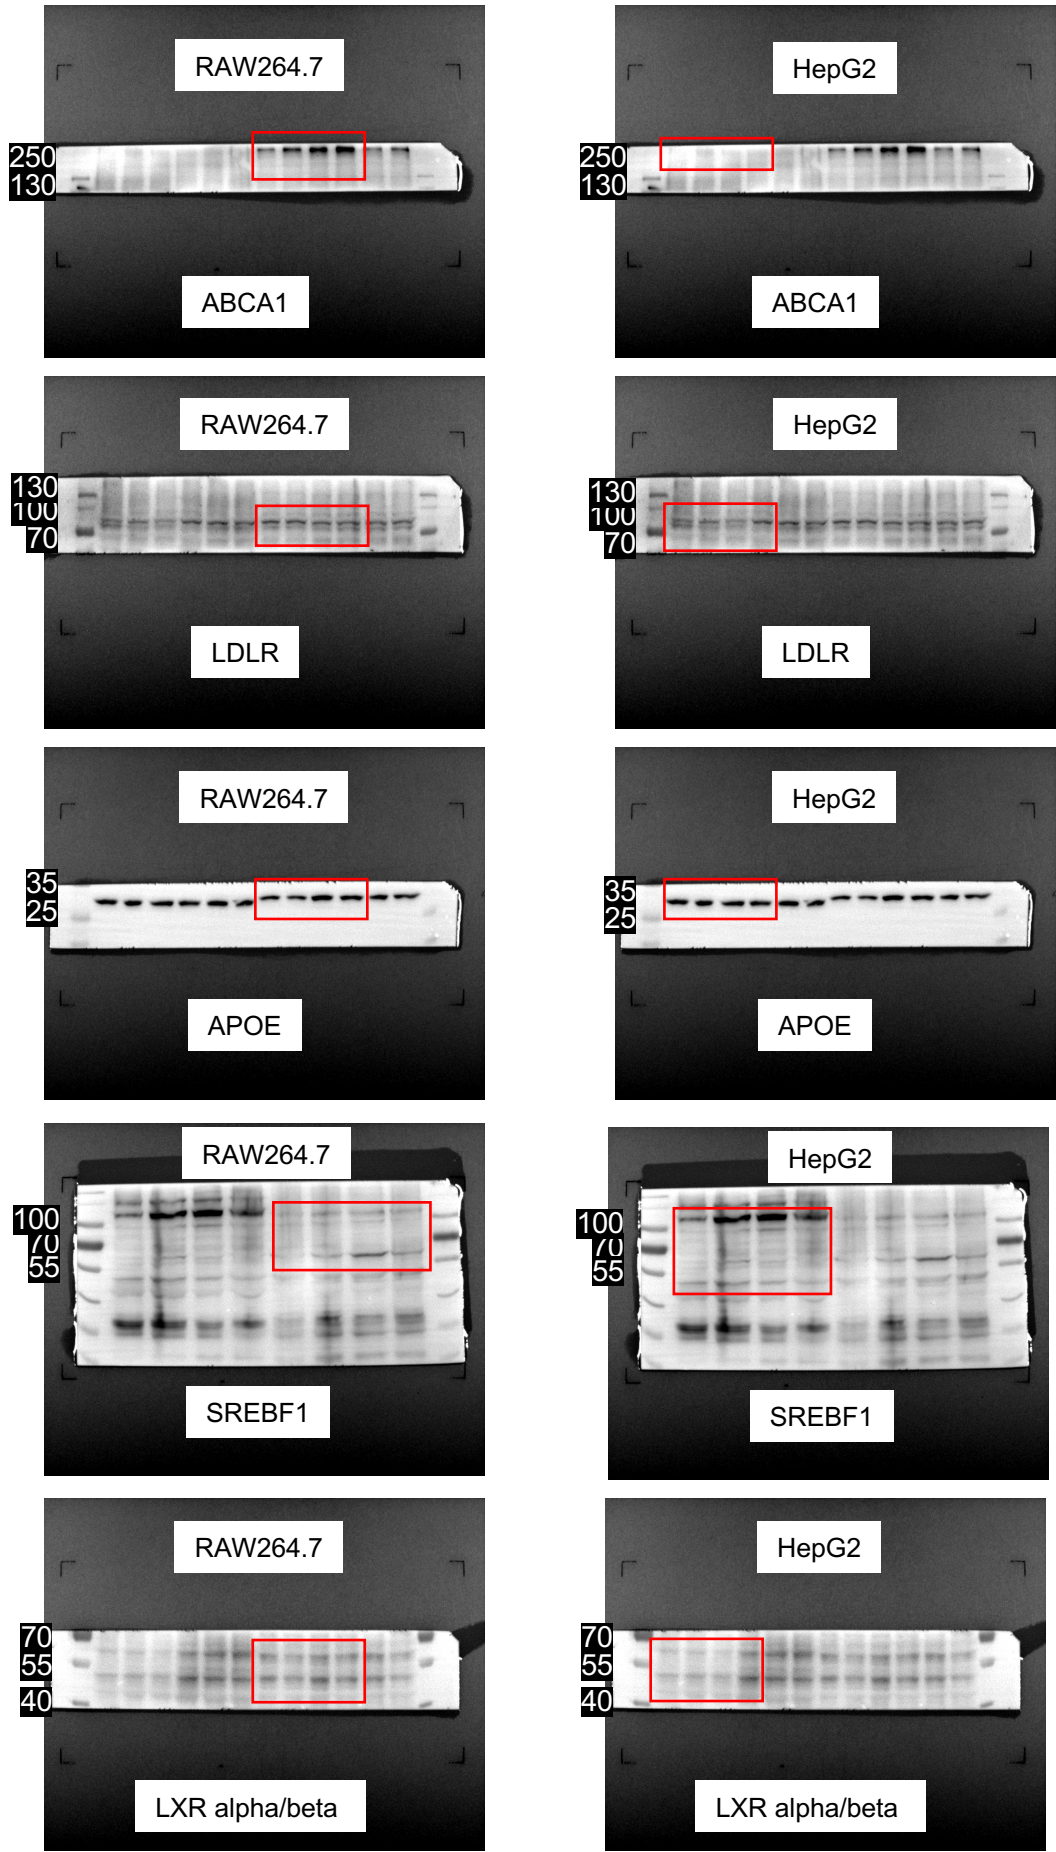

Continued Supplementary Figure 7: Unprocessed image of sFigure 3

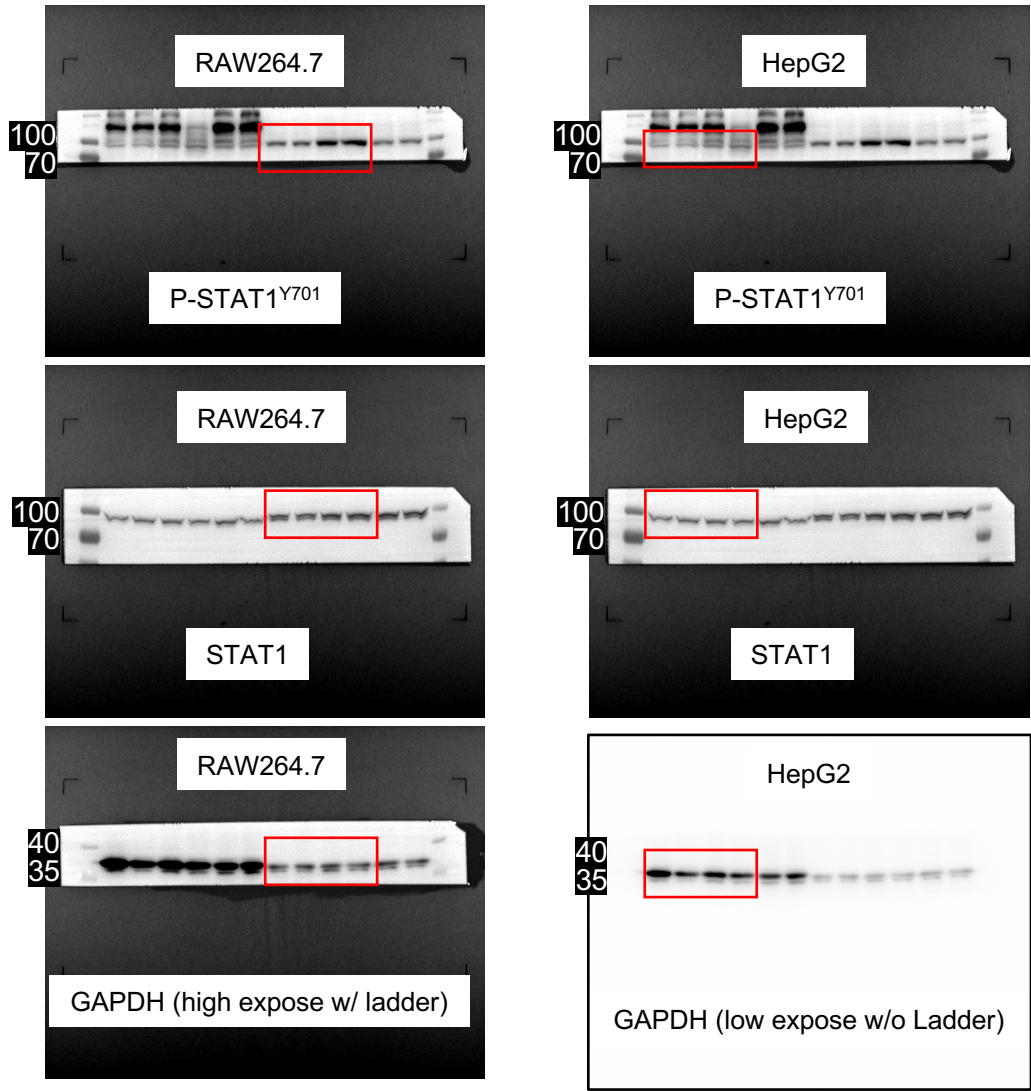

Supplementary Figure 8: Unprocessed image of Figure 1C

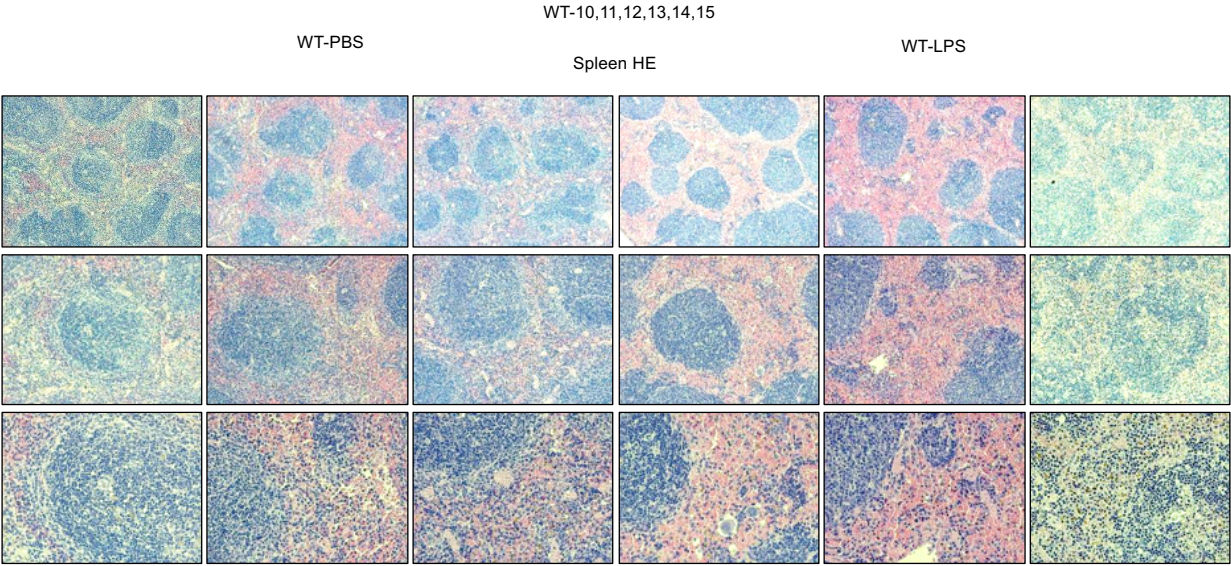

2020-8-19

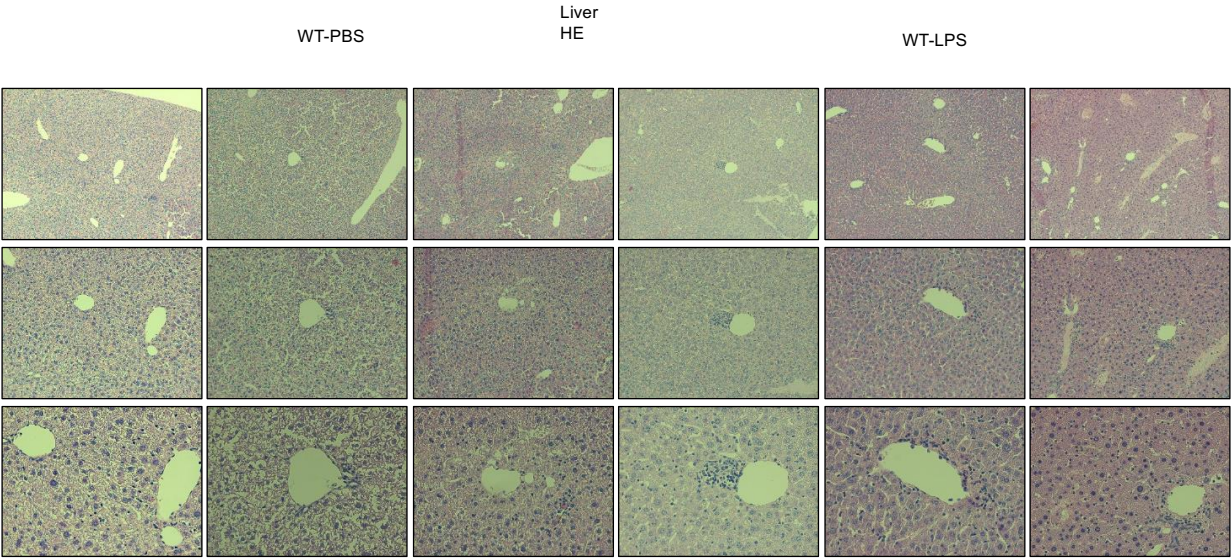

2020-8-19



Supplementary Figure 9: Unprocessed image of Figure 2D

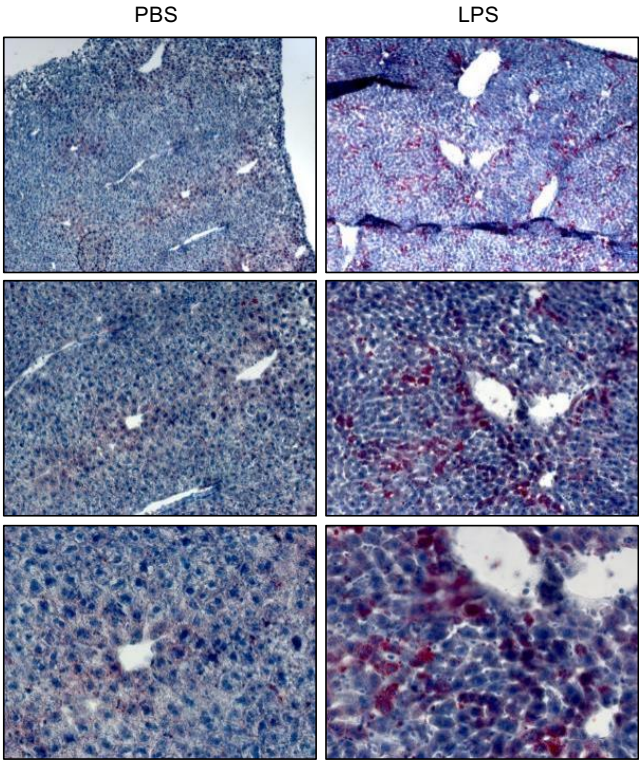

2020-7-8

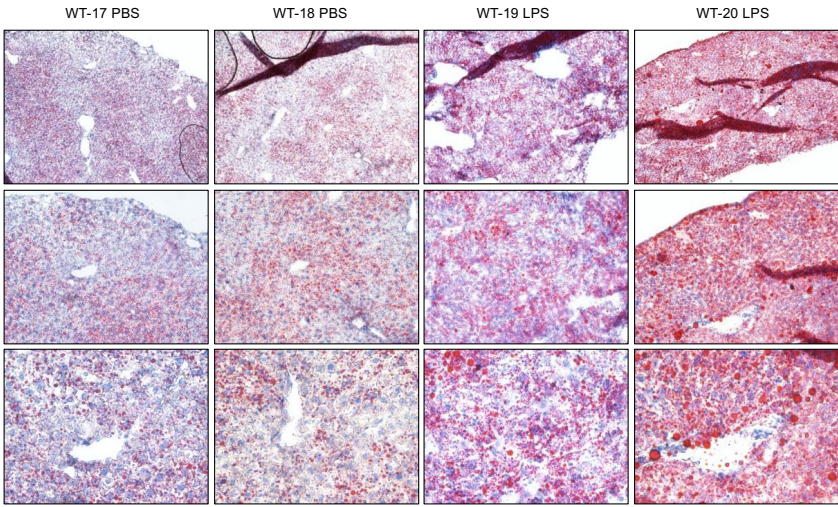

2020-7-9

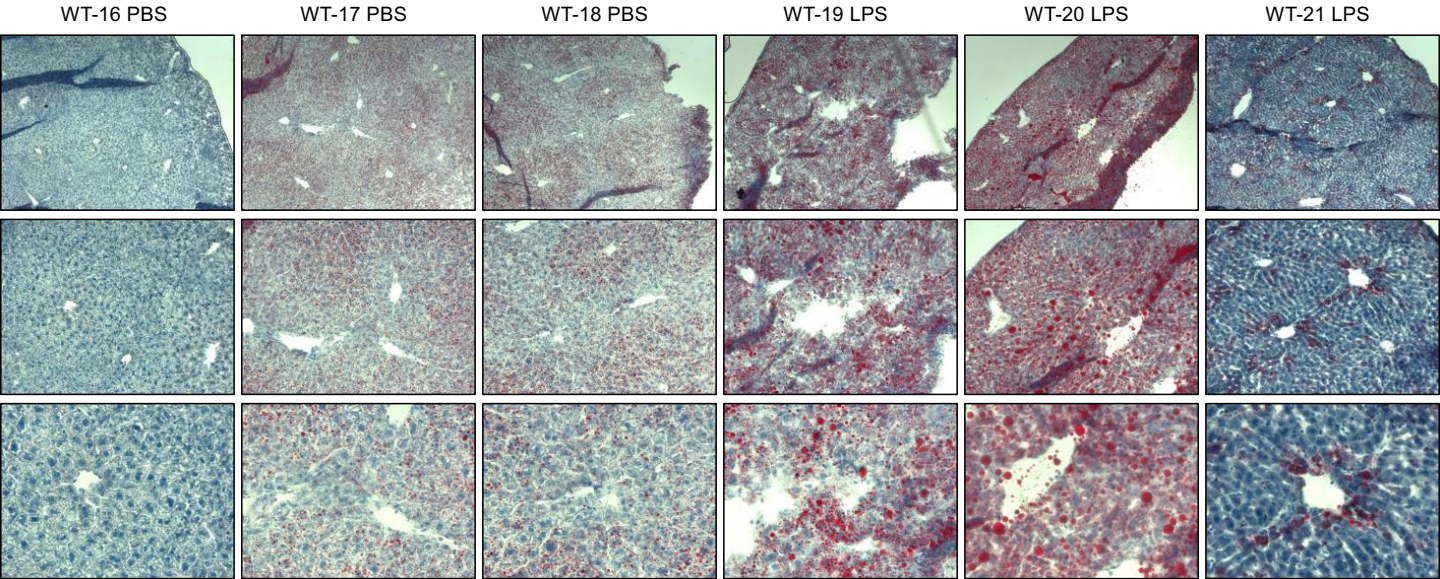



Supplementary Figure 10: Unprocessed image of Figure 3C

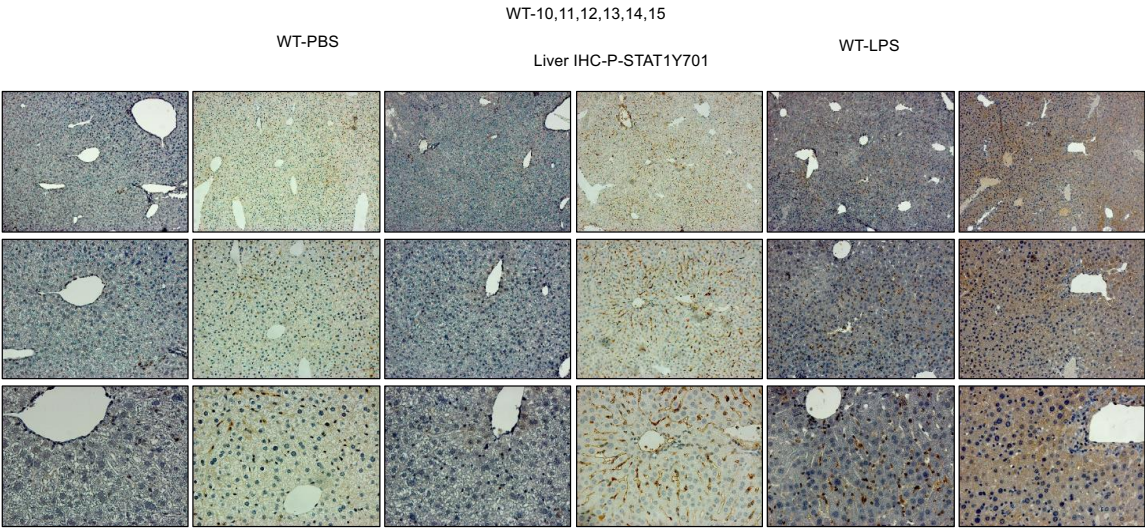

2020-8-31

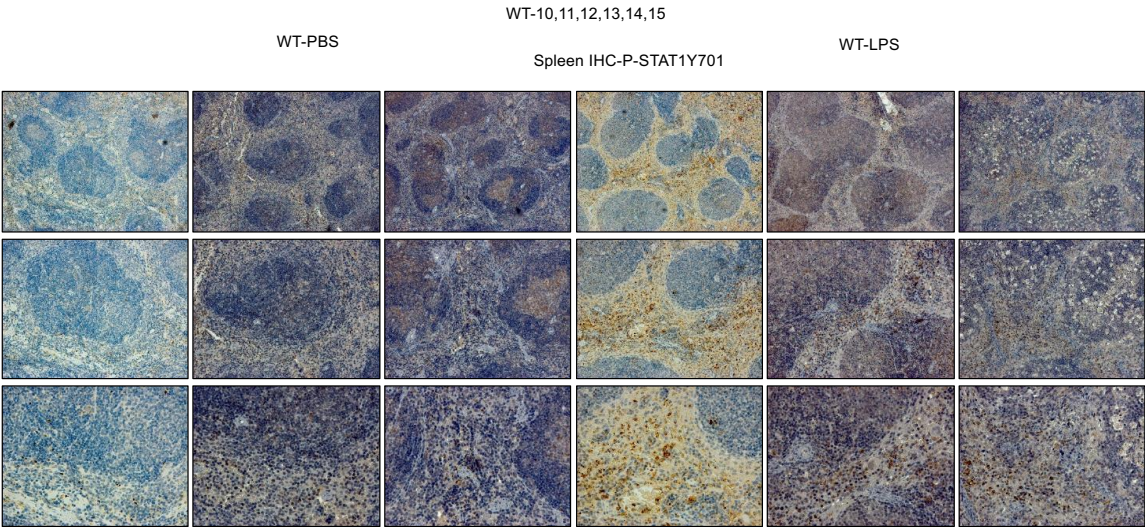

2020-8-31

Supplementary Figure 11: Unprocessed image of Figure 4D

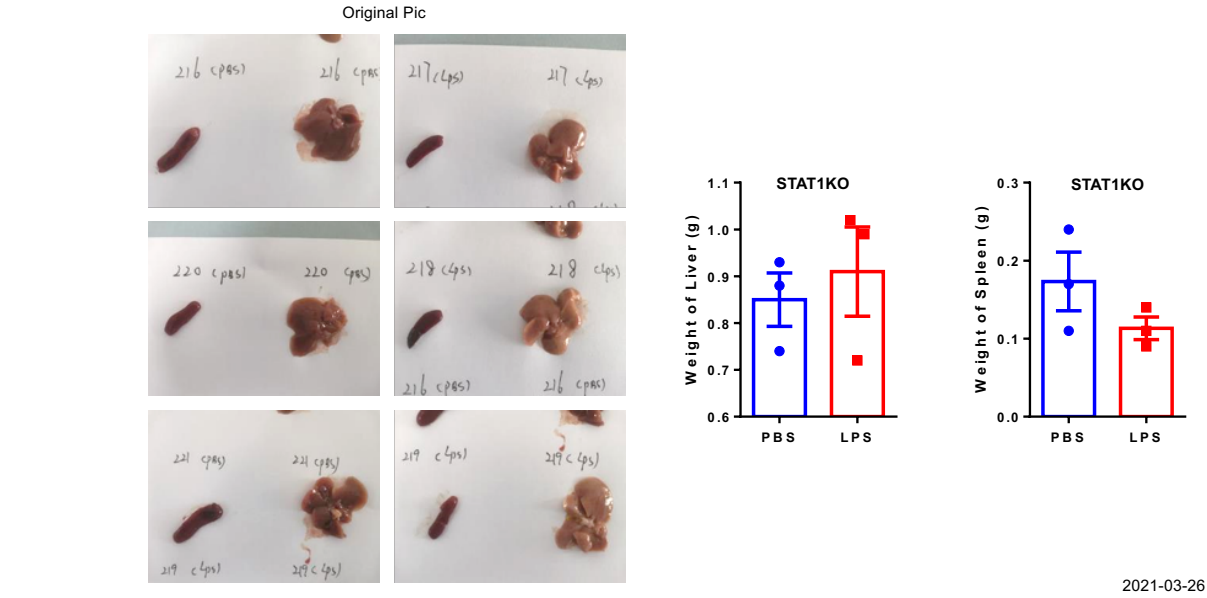

Supplement: Supplementary file 1 [file 3c55ed4d3fc5bfa49974c33d.pdf]
