# Supplementary material for: LPS stimulating upregulates lipid accumulation in mice liver dependent onSTAT1/APOE axis signaling pathway.
Source: Research Square preprint supplement (doi:10.21203/rs.3.rs-6214389/v1), 2025-04-10
Supplement: Supplementary file 2 [file f048ccb6fb7fb96c5a1f24f7.pdf]

Supplementary Figure 1

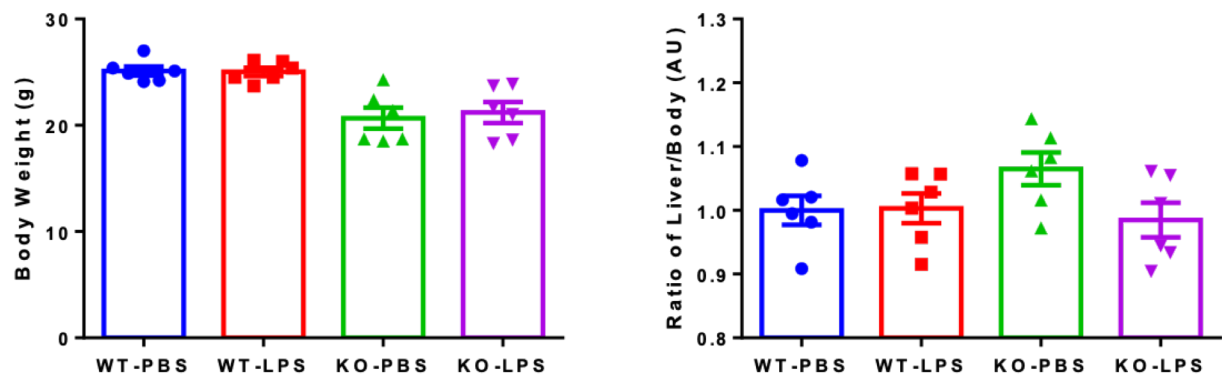

Supplementary Figure 1. STAT1 knockout hasn't effect on physical signs. The body weight and ratio of liver/body in wild type and STAT1-KO mice with or without LPS stimulation.

Supplementary Figure 2

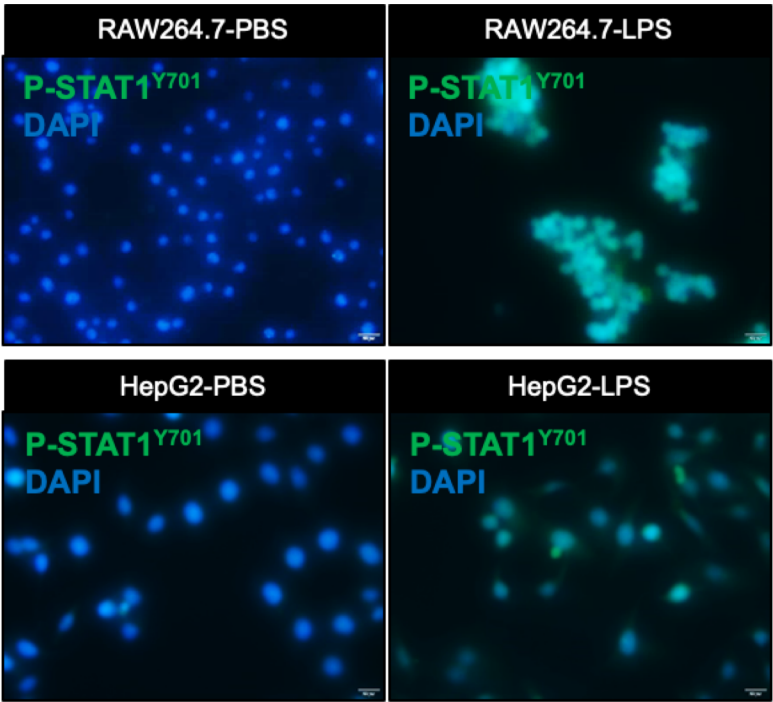

Supplementary Figure 2. LPS can activate STAT1 signaling in macrophage and hepatic cells. The representative picture of immunofluorescence, 2 ug/mL LPS stimulates RAW264.7 and HepG2 cell line for 4 hours.

Supplementary Figure 3

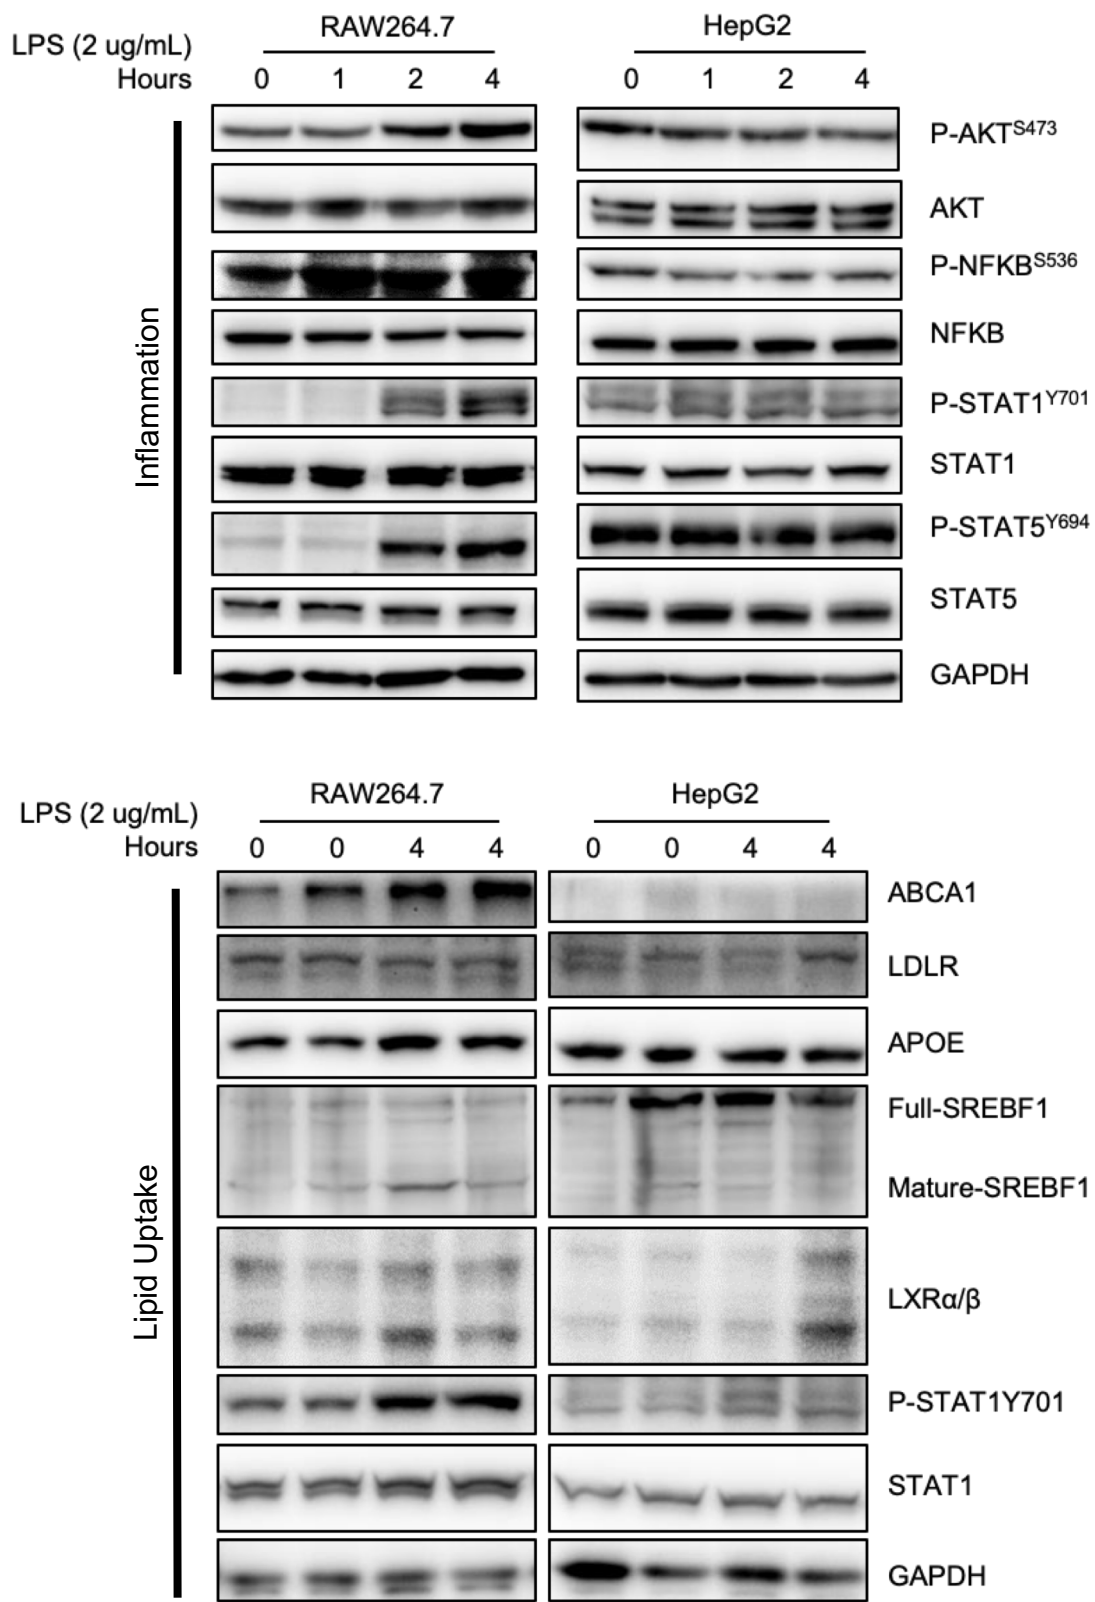

Supplementary Figure 3. LPS can activate inflammation and lipid uptake in macrophage in vitro. Detecting inflammatory and lipid uptake related protein expression in RAW264.7 and HepG2 cell line after 2 ug/mL LPS stimulation.
